# Supplementary material for: Succession of transiently active tumor‐initiating cell clones in human pancreatic cancer xenografts
Source: PubMed Central journal article supplement (PMC5494525; doi:10.15252/emmm.201607354), 2017-05-19
Supplement: EMMM-9-918-s001.pdf [file EMMM-9-918-s001.pdf]

# Appendix

## 1. Appendix Supplementary Figures and Tables

**Appendix Figure S1:** Histology of xenografted tumors is unchanged in serial transplantation.

**Appendix Figure S2:** CD133 positive and negative tumor cells are equally capable to form tumors.

**Appendix Table S1:** Marker expression of adherent primary pancreatic TIC cultures.

**Appendix Table S2:** Single nucleotide variants in serially transplanted lentivirally marked PDAC xenografts.

**Appendix Table S3:** Upper  $(1-\beta)$  confidence bounds,  $N_u^-$ , for the number of cells in a non-detected clone.

**Appendix Table S4:** Range of clone sizes in  $T_1$  (estimated cell numbers).

**Appendix Table S5:** Comparative gene expression profiling of serum-free and FBS treated adherent cultures.

**Appendix Table S6:** Cell surface marker expression does not predict tumor-initiating capacity.

## 2. Appendix Supplementary Methods

## 3. Appendix Supplementary Statistical Results

## 4. Appendix Supplementary References

# 1. Appendix Supplementary Figures and Tables

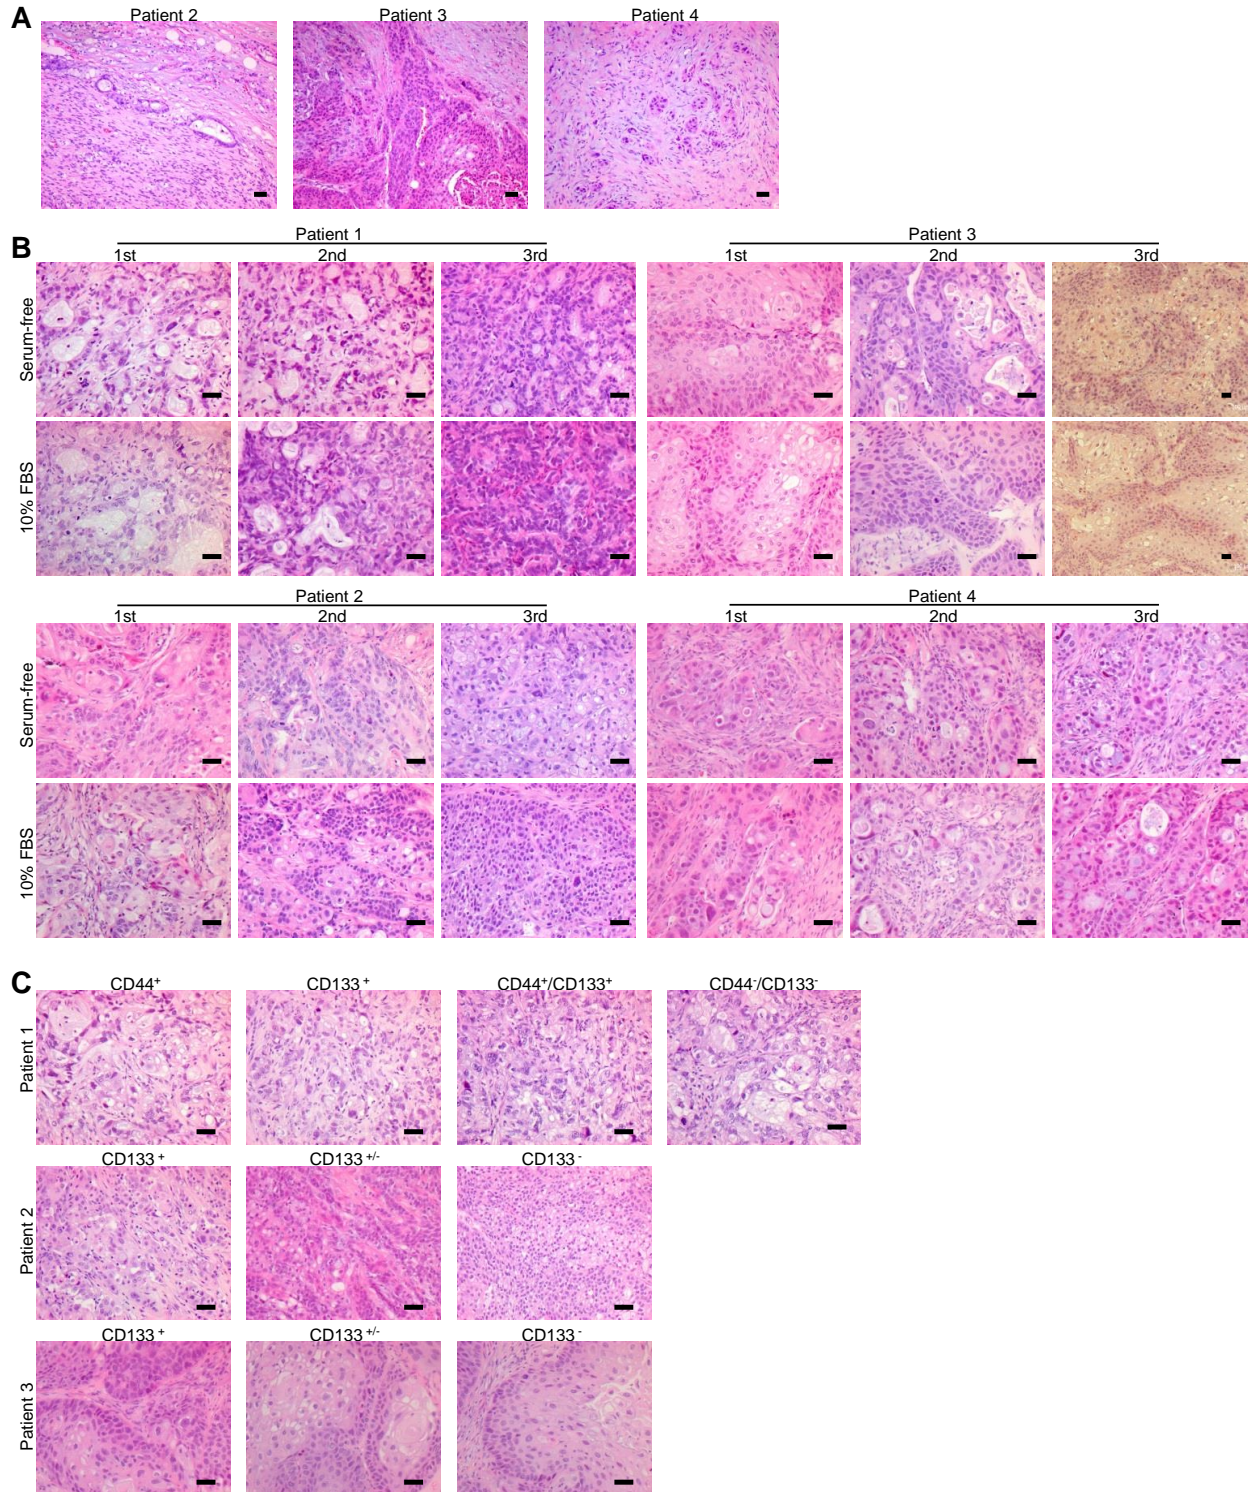

**Appendix Figure S1: Histology of xenografted tumors is unchanged in serial transplantation.** (A) Original patient tumor histologies. Scale bars = 100 $\mu$ m. (B) No difference in the histology of xenografted tumors after transplantation of pancreatic TIC cultured under serum-free or differentiation conditions (10% FBS). Scale bars = 50 $\mu$ m. 1st, 2nd, 3rd indicate serial mouse generations. Experiment was performed in duplicates. (C) Sorted CD133<sup>+</sup> and CD133<sup>-</sup> cells formed tumors with similar histology. Scale bars = 50 $\mu$ m.

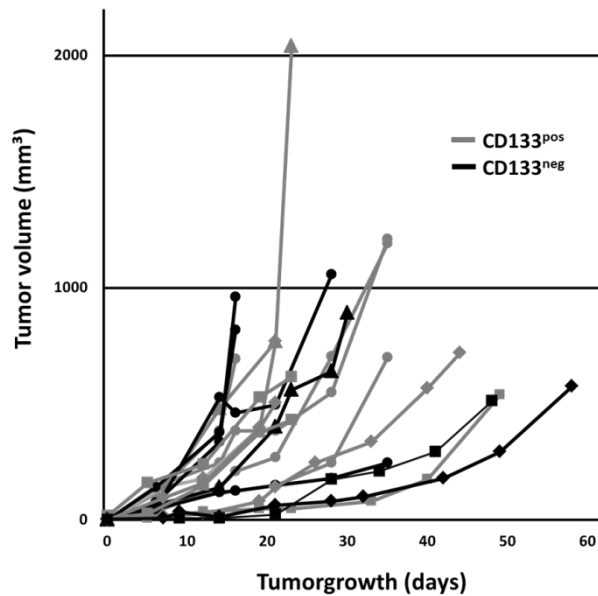

**Appendix Figure S2: CD133 positive and negative tumor cells are equally capable to form tumors.** Tumor pieces derived from patient P5 (▲), P6 (●), P7(◆) and P8(■) which were not cultivated in vitro before were expanded in NSG mice and sorted according CD133 expression in CD133 positive (CD133<sup>pos</sup>, black lines) and CD133 negative (CD133<sup>neg</sup>, grey lines) fractions. For each patient equal numbers of CD133<sup>pos</sup>, or CD133<sup>neg</sup>, cells were subcutaneously transplanted into NSG mice. Tumor volume was regularly estimated by manual caliper measurements. Mice were sacrificed when tumors reached the maximum tolerable size or when mandated by animal morbidity.

**Appendix Table S1: Marker expression of adherent primary pancreatic TIC cultures.**

| Marker                             | Patient 1  |           | Patient 2  |           | Patient 3  |           | Patient 4  |           |
|------------------------------------|------------|-----------|------------|-----------|------------|-----------|------------|-----------|
|                                    | Serum-free | 10% FBS   | Serum-free | 10% FBS   | Serum-free | 10% FBS   | Serum-free | 10% FBS   |
| <b>Flow Cytometry</b>              |            |           |            |           |            |           |            |           |
| CD133                              | 10 - 94%   | 1 - 55%   | 11 - 98%   | 0 - 37%   | 0.3 - 14%  | 1 - 45%   | 12 - 87%   | 3 - 60%   |
| CD44                               | 75 - 100%  | 96 - 100% | 86 - 100%  | 45 - 100% | 87 - 100%  | 97 - 100% | 73 - 100%  | 70 - 100% |
| CD24                               | 2 - 85%    | 59 - 96%  | 0.2 - 22%  | 0.1 - 10% | 60 - 98%   | 25 - 91%  | 55 - 94%   | 55 - 99%  |
| EpCam                              | 87 - 100%  | 96 - 100% | 81 - 100%  | 92 - 100% | 90 - 100%  | 95 - 100% | 69 - 100%  | 95 - 100% |
| <b>Indirect Immunofluorescence</b> |            |           |            |           |            |           |            |           |
| KRT7                               | +          | +         | +          | +         | +          | +         | +          | +         |
| PTF1a                              | +          | +         | +          | +         | +          | +         | -          | -         |
| Amylase                            | +          | +         | n.d.       | n.d.      | +          | +         | n.d.       | n.d.      |
| Vimentin                           | +/-        | +         | -          | -         | -          | -         | +          | +         |
| Zeb1                               | +          | +         | +          | +         | +          | +         | n.d.       | n.d.      |
| E-Cadherin                         | +          | +         | n.d.       | n.d.      | n.d.       | n.d.      | n.d.       | n.d.      |
| $\beta$ -catenin                   | +          | +         | n.d.       | n.d.      | n.d.       | n.d.      | n.d.       | n.d.      |
| SOX2                               | +/-        | +         | +          | +/-       | +          | +         | -          | -         |
| OCT4                               | +          | +         | +          | +         | +          | +         | +          | +         |
| KLF4                               | +          | +         | n.d.       | n.d.      | n.d.       | n.d.      | n.d.       | n.d.      |
| Oil droplets                       | -          | -         | -          | -         | -          | +         | n.d.       | n.d.      |

Previously described TIC associated cell surface markers were measured by flow cytometry; intracellular markers were analyzed by indirect immunofluorescence staining. Cultures were assigned + when positive cells were detected in at least two independent visual fields of the same sample, +/- when only single positive cells were identified and - if no positive stained cells were detectable. n.d = not determined.

**Appendix Table S2: Single nucleotide variants in serially transplanted lentivirally marked PDAC xenografts.**

| Patient P1 |           |                  |                |              | Sequencing Depth |             |              |              |              | Altered allele frequency |             |              |              |              |
|------------|-----------|------------------|----------------|--------------|------------------|-------------|--------------|--------------|--------------|--------------------------|-------------|--------------|--------------|--------------|
| Chromosome | Position  | Reference Allele | Altered Allele | Gene         | Patient Tumor    | TIC culture | Xenograft 1° | Xenograft 2° | Xenograft 3° | Patient Tumor            | TIC culture | Xenograft 1° | Xenograft 2° | Xenograft 3° |
| 1          | 231081360 | C                | A              | TTC13        | 198              | 158         | 141          | 132          | 140          | 0,00                     | 0,00        | 0,00         | 0,05         | 0,02         |
| 14         | 20444084  | T                | A              | OR4K15       | 242              | 198         | 172          | 151          | 148          | 0,00                     | 0,00        | 0,00         | 0,06         | 0,03         |
| 7          | 149495370 | C                | G              | SSPO         | 61               | 56          | 50           | 36           | 44           | 0,00                     | 0,00        | 0,00         | 0,11         | 0,02         |
| 19         | 519401    | C                | T              | TPGS1        | 48               | 23          | 24           | 21           | 26           | 0,00                     | 0,00        | 0,00         | 0,14         | 0,27         |
| 19         | 51628632  | G                | A              | SIGLEC9      | 179              | 242         | 208          | 167          | 186          | 0,00                     | 0,01        | 0,00         | 0,06         | 0,08         |
| 3          | 190575666 | T                | G              | GMNC         | 238              | 256         | 195          | 192          | 174          | 0,00                     | 0,11        | 0,09         | 0,11         | 0,11         |
| 3          | 164906602 | C                | T              | SLITRK3      | 96               | 99          | 126          | 111          | 93           | 0,00                     | 0,13        | 0,10         | 0,13         | 0,13         |
| 4          | 89397167  | C                | A              | HERC5        | 83               | 93          | 79           | 71           | 77           | 0,00                     | 0,11        | 0,22         | 0,18         | 0,17         |
| 10         | 77168375  | G                | A              | ZNF503-A S2  | 47               | 29          | 38           | 36           | 31           | 0,00                     | 0,31        | 0,24         | 0,17         | 0,35         |
| 1          | 10678409  | C                | T              | PEX14        | 169              | 128         | 89           | 90           | 101          | 0,01                     | 0,35        | 0,35         | 0,41         | 0,33         |
| Patient P3 |           |                  |                |              | Sequencing Depth |             |              |              |              | Altered allele frequency |             |              |              |              |
| Chromosome | Position  | Reference Allele | Altered Allele | Gene         | Healthy Tissue   | TIC culture | Xenograft 1° | Xenograft 2° | Xenograft 3° | Healthy Tissue           | TIC culture | Xenograft 1° | Xenograft 2° | Xenograft 3° |
| 10         | 98742139  | C                | A              | C10orf12     | 113              | 70          | 43           | 44           | 36           | 0,00                     | 0,00        | 0,00         | 0,14         | 0,17         |
| 6          | 54254685  | G                | A              | TINAG        | 153              | 119         | 66           | 54           | 115          | 0,00                     | 0,15        | 0,02         | 0,00         | 0,03         |
| 17         | 40117070  | G                | A              | TTC25        | 83               | 102         | 75           | 58           | 47           | 0,00                     | 0,18        | 0,08         | 0,12         | 0,23         |
| 1          | 17087561  | C                | T              | MST1L        | 135              | 69          | 69           | 52           | 56           | 0,00                     | 0,14        | 0,14         | 0,12         | 0,13         |
| 20         | 49621352  | G                | T              | RP5-955M13.3 | 85               | 109         | 68           | 89           | 66           | 0,00                     | 0,34        | 0,25         | 0,40         | 0,26         |
| 1          | 32149745  | G                | T              | COL16A1      | 78               | 60          | 46           | 42           | 24           | 0,00                     | 0,33        | 0,28         | 0,17         | 0,42         |
| 1          | 114483136 | C                | T              | HIPK1        | 205              | 210         | 104          | 103          | 111          | 0,00                     | 0,25        | 0,30         | 0,13         | 0,22         |
| 16         | 19488841  | G                | T              | TMC5         | 82               | 121         | 64           | 78           | 61           | 0,01                     | 0,49        | 0,41         | 0,51         | 0,43         |
| 16         | 3615019   | G                | A              | NLRC3        | 71               | 78          | 63           | 50           | 43           | 0,00                     | 0,40        | 0,43         | 0,46         | 0,47         |
| 15         | 81591795  | G                | A              | IL16         | 488              | 683         | 399          | 340          | 310          | 0,00                     | 0,46        | 0,46         | 0,33         | 0,39         |
| 1          | 50941270  | G                | A              | FAF1         | 85               | 72          | 41           | 43           | 38           | 0,00                     | 0,56        | 0,46         | 0,49         | 0,39         |
| 16         | 28133033  | T                | C              | XPO6         | 114              | 125         | 66           | 72           | 80           | 0,00                     | 0,43        | 0,53         | 0,39         | 0,44         |
| 5          | 140553101 | C                | T              | PCDHB7       | 299              | 247         | 185          | 146          | 138          | 0,01                     | 0,52        | 0,55         | 0,48         | 0,51         |
| 11         | 68458451  | C                | T              | GAL          | 307              | 335         | 260          | 207          | 166          | 0,01                     | 0,56        | 0,57         | 0,60         | 0,58         |
| 17         | 44248455  | G                | C              | KANSL1       | 120              | 169         | 83           | 65           | 66           | 0,00                     | 0,66        | 0,58         | 0,65         | 0,65         |
| 19         | 50511077  | C                | T              | VRK3         | 51               | 61          | 31           | 29           | 23           | 0,00                     | 0,46        | 0,58         | 0,59         | 0,48         |
| 2          | 11798685  | G                | A              | NTSR2        | 148              | 170         | 111          | 103          | 83           | 0,00                     | 0,73        | 0,64         | 0,57         | 0,83         |
| 11         | 18309148  | T                | C              | HPS5         | 148              | 196         | 101          | 94           | 76           | 0,01                     | 0,59        | 0,64         | 0,63         | 0,63         |
| 11         | 123814014 | A                | T              | OR6T1        | 169              | 158         | 83           | 91           | 64           | 0,00                     | 0,53        | 0,65         | 0,60         | 0,59         |
| 17         | 35634884  | C                | T              | ACACA        | 87               | 117         | 79           | 61           | 49           | 0,01                     | 0,62        | 0,66         | 0,75         | 0,67         |
| 1          | 155764861 | T                | A              | GON4L        | 107              | 60          | 66           | 53           | 51           | 0,00                     | 0,72        | 0,71         | 0,79         | 0,82         |
| 9          | 139272123 | C                | T              | SNAPC4       | 107              | 88          | 55           | 54           | 46           | 0,01                     | 0,74        | 0,82         | 0,69         | 0,89         |
| 1          | 186008998 | C                | A              | HMCN1        | 89               | 94          | 73           | 60           | 53           | 0,01                     | 0,83        | 0,85         | 0,92         | 0,75         |
| 9          | 21971120  | G                | A              | CDKN2A       | 39               | 34          | 20           | 17           | 13           | 0,00                     | 0,79        | 0,90         | 0,88         | 0,77         |
| 4          | 164415698 | C                | G              | TMA16        | 147              | 90          | 56           | 46           | 41           | 0,00                     | 0,96        | 0,93         | 1,00         | 1,00         |
| 6          | 30955174  | T                | C              | MUC21        | 145              | 112         | 73           | 69           | 70           | 0,01                     | 0,89        | 0,96         | 1,00         | 0,99         |
| 15         | 72186067  | C                | G              | MYO9A        | 132              | 167         | 87           | 103          | 73           | 0,00                     | 0,99        | 1,00         | 1,00         | 0,99         |
| 12         | 25398284  | C                | T              | KRAS         | 218              | 198         | 110          | 94           | 103          | 0,00                     | 0,97        | 1,00         | 1,00         | 0,99         |
| X          | 51640014  | C                | G              | MAGED1       | 242              | 159         | 87           | 115          | 69           | 0,00                     | 1,00        | 1,00         | 1,00         | 1,00         |
| 10         | 129242520 | A                | T              | DOCK1        | 241              | 123         | 71           | 88           | 55           | 0,00                     | 0,98        | 1,00         | 1,00         | 1,00         |
| 15         | 75144528  | C                | A              | SCAMP2       | 60               | 96          | 55           | 45           | 34           | 0,02                     | 1,00        | 1,00         | 1,00         | 1,00         |
| 15         | 80988233  | C                | A              | ABHD17C      | 69               | 107         | 44           | 45           | 42           | 0,01                     | 1,00        | 1,00         | 1,00         | 1,00         |
| 17         | 7578257   | C                | A              | TP53         | 113              | 82          | 64           | 53           | 37           | 0,01                     | 1,00        | 1,00         | 1,00         | 1,00         |
| 18         | 45395781  | G                | C              | SMAD2        | 111              | 64          | 67           | 33           | 35           | 0,02                     | 1,00        | 1,00         | 1,00         | 1,00         |
| X          | 130407781 | C                | T              | IGSF1        | 51               | 44          | 20           | 23           | 20           | 0,00                     | 1,00        | 1,00         | 1,00         | 1,00         |

Exome sequencing of primary culture and subsequent xenograft generations (1°-3°) as well as corresponding healthy tissue control (P3) or original patient tumor tissue (P1) demonstrated a very limited number of newly acquired mutations during serial transplantation. Orange colored fields indicate proportion of altered allele frequencies. Grey colored gene fields mark genes with novel mutations acquired during serial transplantation. Xenograft 1° - 3°= Xenograft generation 1 - 3.

**Appendix Table S3: Upper (1- $\beta$ ) confidence bounds,  $N_u^-$ , for the number of cells in a non-detected clone<sup>(\*)</sup>**

| Experiment | $N_u^-$     |       |     |       |     |       |     |      |
|------------|-------------|-------|-----|-------|-----|-------|-----|------|
|            | T1          |       | T2a |       | T2b |       | T2c |      |
|            | $\beta=1\%$ | 0.01‰ | 1%  | 0.01‰ | 1%  | 0.01‰ | 1%  | .01‰ |
| P1-1       | 149         | 344   | 191 | 440   | 167 | 385   | 134 | 309  |
| P2-1       | 205         | 474   | 243 | 561   | 203 | 468   |     |      |
| P3-1       | 262         | 604   | 273 | 629   | 114 | 262   |     |      |
| P3-2       | 50          | 115   | 100 | 232   | 93  | 215   |     |      |
| P3-3       | 67          | 154   | 74  | 172   | 138 | 319   |     |      |

<sup>(\*)</sup> test-based, Clopper-Pearson type, two-sided. The sampling fractions, i.e. the proportions  $s$  of cells in the tumors whose DNA was analyzed for clonality, in the 5 experiments and used in the calculation were: T<sub>1</sub>:  $s=3.48\%$ ,  $2.54\%$ ,  $2.0\%$ ,  $10\%$ ,  $7.6\%$ ; T<sub>2a</sub>:  $s=2.73\%$ ,  $2.15\%$ ,  $1.92\%$ ,  $5.12\%$ ,  $6.85\%$ ; T<sub>2b</sub>:  $s=3.12\%$ ,  $2.57\%$ ,  $4.54\%$ ,  $5.50\%$ ,  $3.75\%$ ; T<sub>2c</sub>:  $s=3.87\%$  (Exp. P1-1)

**Appendix Table S4: Range of clone sizes in T<sub>1</sub> (estimated cell numbers).**

| Experiment | Numbers of cells per clone |            |                                            |
|------------|----------------------------|------------|--------------------------------------------|
|            | min (obs.)                 | max (obs.) | min (present, but non-obs.) <sup>(*)</sup> |
| P1-1       | 4,401                      | 509,095    | ≤ 11                                       |
| P2-1       | 10,566                     | 1,013,328  | ≤ 20                                       |
| P3-1       | 75,918                     | 4,357,437  | ≤ 20                                       |
| P3-2       | 20,885                     | 1,946,043  | ≤ 2                                        |
| P3-3       | 378                        | 94,871     | ≤ 11                                       |

<sup>(\*)</sup> upper bounds based on confidence bounds shown in Appendix Table S3 ( $\beta=0.01\%$ ). Since the minimum sizes multiplied with the number of clones must not exceed the values in Appendix Table S3 the results were rounded to the next lower integer.

Appendix Table S5: Comparative gene expression profiling of serum-free and FBS treated adherent cultures.

| P1                                       |                |             |             | P2             |             |             |                |             |             |                |             |             |
|------------------------------------------|----------------|-------------|-------------|----------------|-------------|-------------|----------------|-------------|-------------|----------------|-------------|-------------|
| Stem Cell Associated Markers             | 3P, serum-free | 3P, 10% FBS | fold change | 8P, serum-free | 8P, 10% FBS | fold change | 3P, serum-free | 3P, 10% FBS | fold change | 8P, serum-free | 8P, 10% FBS | fold change |
| SOX2                                     |                |             | -0.46       |                |             | 0.68        |                |             | -1.04       |                |             | -0.57       |
| OCT4                                     |                |             | 0.08        |                |             | -0.09       |                |             | 0.05        |                |             | 0.09        |
| c-Myc                                    |                |             | -0.74       |                |             | -0.62       |                |             | -1.01       |                |             | -0.05       |
| KLF4                                     |                |             | -0.61       |                |             | -1.00       |                |             | -1.09       |                |             | 0.72        |
| NOTCH1                                   |                |             | -1.04       |                |             | 1.00        |                |             | -1.02       |                |             | -1.68       |
| ALDH1A1                                  |                |             | -1.93       |                |             | -1.60       |                |             | -0.63       |                |             | -2.07       |
| ALDH1A2                                  |                |             | -0.23       |                |             | 0.43        |                |             | -0.40       |                |             | -0.05       |
| ALDH1A3                                  |                |             | 3.92        |                |             | 4.88        |                |             | 0.78        |                |             | 2.28        |
| PROM1                                    |                |             | -0.98       |                |             | -1.36       |                |             | -2.74       |                |             | -1.96       |
| CD44                                     |                |             | -0.06       |                |             | 0.02        |                |             | -0.26       |                |             | -0.43       |
| EpCam                                    |                |             | -0.27       |                |             | -1.04       |                |             | -0.85       |                |             | -0.32       |
| CD24                                     |                |             | 0.27        |                |             | 1.77        |                |             | 0.87        |                |             | -0.51       |
| CXCR4                                    |                |             | -0.15       |                |             | -0.08       |                |             | -0.13       |                |             | -0.03       |
| Pancreatic Progenitor Associated Markers |                |             |             |                |             |             |                |             |             |                |             |             |
| SOX9                                     |                |             | -0.91       |                |             | -0.80       |                |             | -0.95       |                |             | -1.27       |
| PDX1                                     |                |             | -0.32       |                |             | -0.22       |                |             | -0.03       |                |             | 0.05        |
| HES1                                     |                |             | -0.87       |                |             | -0.73       |                |             | -1.21       |                |             | 1.54        |
| Ductal differentiation markers           |                |             |             |                |             |             |                |             |             |                |             |             |
| KRT7                                     |                |             | 0.41        |                |             | 0.39        |                |             | 2.81        |                |             | 2.94        |
| KRT19                                    |                |             | -0.60       |                |             | -1.09       |                |             | 0.37        |                |             | -0.02       |
| CEACAM1                                  |                |             | -0.86       |                |             | -0.37       |                |             | 0.24        |                |             | 0.82        |
| CEACAM5                                  |                |             | -2.96       |                |             | -5.09       |                |             | 2.38        |                |             | 1.44        |

  

| P3                                       |                |             |             | P4             |             |             |                |             |             |                |             |             |
|------------------------------------------|----------------|-------------|-------------|----------------|-------------|-------------|----------------|-------------|-------------|----------------|-------------|-------------|
| Stem Cell Associated Markers             | 3P, serum-free | 3P, 10% FBS | fold change | 8P, serum-free | 8P, 10% FBS | fold change | 3P, serum-free | 3P, 10% FBS | fold change | 8P, serum-free | 8P, 10% FBS | fold change |
| SOX2                                     |                |             | -1.06       |                |             | -1.64       |                |             | 0.01        |                |             | 0.45        |
| OCT4                                     |                |             | -0.02       |                |             | -0.14       |                |             | 0.13        |                |             | -0.18       |
| c-Myc                                    |                |             | -0.69       |                |             | -0.18       |                |             | -0.06       |                |             | 2.80        |
| KLF4                                     |                |             | -0.34       |                |             | -1.35       |                |             | -1.03       |                |             | 0.44        |
| NOTCH1                                   |                |             | -0.64       |                |             | -0.54       |                |             | 0.24        |                |             | -0.11       |
| ALDH1A1                                  |                |             | -0.70       |                |             | -0.31       |                |             | -0.51       |                |             | -0.02       |
| ALDH1A2                                  |                |             | 0.01        |                |             | 0.06        |                |             | -0.03       |                |             | 0.09        |
| ALDH1A3                                  |                |             | 1.32        |                |             | 2.63        |                |             | 2.67        |                |             | 0.54        |
| PROM1                                    |                |             | 0.68        |                |             | 1.52        |                |             | -1.48       |                |             | 0.27        |
| CD44                                     |                |             | -0.20       |                |             | -0.02       |                |             | -0.69       |                |             | 0.31        |
| EpCam                                    |                |             | 0.21        |                |             | -0.26       |                |             | 0.28        |                |             | 0.46        |
| CD24                                     |                |             | -0.41       |                |             | -0.08       |                |             | 0.32        |                |             | -0.13       |
| CXCR4                                    |                |             | 0.05        |                |             | -0.48       |                |             | -0.03       |                |             | 0.05        |
| Pancreatic Progenitor Associated Markers |                |             |             |                |             |             |                |             |             |                |             |             |
| SOX9                                     |                |             | -1.77       |                |             | 0.05        |                |             | 0.20        |                |             | 0.82        |
| PDX1                                     |                |             | -0.19       |                |             | 0.52        |                |             | -0.22       |                |             | -0.03       |
| HES1                                     |                |             | -0.91       |                |             | -1.92       |                |             | 0.98        |                |             | 0.31        |
| Ductal differentiation markers           |                |             |             |                |             |             |                |             |             |                |             |             |
| KRT7                                     |                |             | 1.22        |                |             | 1.90        |                |             | 1.62        |                |             | 0.29        |
| KRT19                                    |                |             | -0.42       |                |             | -0.51       |                |             | 0.82        |                |             | 0.00        |
| CEACAM1                                  |                |             | -2.32       |                |             | 1.16        |                |             | 1.10        |                |             | 0.66        |
| CEACAM5                                  |                |             | -3.48       |                |             | -0.33       |                |             | 1.14        |                |             | 0.63        |

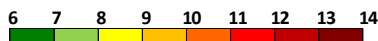

Absolute expression

Fold change of gene expression in serum treated cells (10% FBS) compared to control cultures (serum-free). Color code indicates levels of absolute expression values. An at least 2-fold increase is highlighted in light red and at least 2-fold decreased expression is highlighted in light blue fold change numbers. Analysis was performed in culture passage 3 (3P) and 8 (8P). P1 - 4: patient number 1 - 4.



**Appendix Table S6: Cell surface marker expression does not predict tumor-initiating capacity.**

**Patient 1**

| Fraction                    | Sorted from | Tumour (g) | CD44<br>in vivo (%) | CD133<br>in vivo (%) |
|-----------------------------|-------------|------------|---------------------|----------------------|
| CD44/<br>CD133 <sup>-</sup> | Serum-free  | 1.9        | 6.2                 | 42.4                 |
| CD44/<br>CD133 <sup>-</sup> | Serum-free  | 0.9        | 6.5                 | 36.1                 |
| CD44/<br>CD133 <sup>+</sup> | Serum-free  | 1.2        | 5.7                 | 39.4                 |
| CD44/<br>CD133 <sup>+</sup> | Serum-free  | 1.6        | 4.2                 | 35.1                 |

**Patient 2**

| Fraction             | Sorted from | Tumour 1 (g) | CD133<br>in vivo (%) | Tumour 2 (g) | CD133<br>in vivo (%) |
|----------------------|-------------|--------------|----------------------|--------------|----------------------|
| CD133 <sup>-</sup>   | Serum-free  | 0.8          | 31.9                 | 0.6          | n.d.                 |
| CD133 <sup>+/-</sup> | Serum-free  | 0.45         | 20.8                 | 0            |                      |
| CD133 <sup>+</sup>   | Serum-free  | 0.15         | 21.7                 | 0            |                      |

| Fraction           | Sorted from | Tumour 1 (g) | CD133<br>in vivo (%) | Tumour 2 (g) | CD133<br>in vivo (%) | Tumour 3 (g) | CD133<br>in vivo (%) |
|--------------------|-------------|--------------|----------------------|--------------|----------------------|--------------|----------------------|
| CD133 <sup>-</sup> | 10% FBS     | 0.4          | 22.8                 | 0.6          | 21.9                 | 0.1          | n.d.                 |

**Patient 3**

| Fraction             | Sorted from | Tumour 1 (g) | CD133<br>in vivo (%) | Tumour 2 (g) | CD133<br>in vivo (%) |
|----------------------|-------------|--------------|----------------------|--------------|----------------------|
| CD133 <sup>-</sup>   | 10% FBS     | 1.1          | 0.2                  | 0.7          | 0.7                  |
| CD133 <sup>+/-</sup> | 10% FBS     | 0.35         | 0.2                  | 0.3          | 0.4                  |
| CD133 <sup>+</sup>   | 10% FBS     | 0.4          | 0.2                  | 0.6          | 0.5                  |
| CD133 <sup>-</sup>   | 10% FBS     | 0.5          | 0.2                  | n.d.         |                      |

Sorted CD133<sup>+</sup> and CD133<sup>-</sup> cell fractions are equally able to form tumors in immune-deficient mice. Tumors grown from highly purified CD133<sup>-</sup> and CD133<sup>+</sup> cells contained the same proportion of cells expressing CD133 (columns: CD133 in vivo). For patients 2 and 3 tumors were transplanted in duplicates or triplicates (columns: Tumor 1/2/3). Tumor weights are indicated in gram (g). Beside CD133 positive enriched (CD133<sup>+</sup>) intermediate fractions (CD133<sup>+/-</sup>) were sorted. CD133 negative cell fractions were sorted once (CD133<sup>-</sup>) or twice (CD133<sup>-</sup>) for enrichment.

## 2. Appendix Supplementary Methods

### 1. Statistic methods

#### 1. General Remarks

The statistical analysis focused exclusively on transduced cells; i.e., in what follows the terms “tumor”, “sample”, and “clone” solely refer to transduced cells. The following three null hypotheses were tested:

$H_{0,p1}$ : Proliferation rates of all clones in a tumor are identical;

$H_{0,p2}$ : Proliferation rates of all clones in the primary or secondary mice, while possibly heterogeneous, are identical to the proliferation rates of the same clones in the next mouse generation (“constant growth rates”).

$H_{0,s}$ : The seeding efficiencies of all clones in a tumor are identical.

In addition to standard methods, such as Fisher’s exact test for equality of proportions and Clopper-Pearson confidence intervals for proportions, we employed techniques that were tailored to the special situation encountered here, characterized, e.g., by complex serial sampling, the absence of longitudinal observations on clone growth, unknown number of clones present in the tumors, and the need to simultaneously account for observations gathered from different mouse generations:

**1.1. Confidence interval p-values.** This is an important tool for worst-case analyses. The concept was developed by Berger and Boos (Berger & Boos, 1994), and in some way constitutes an improvement over the old idea of supremum p-values originally formulated by Barnard (Barnard, 1947), which stated that when using a statistical test involving a nuisance parameter  $\Theta$ , a valid p-value can be obtained by maximizing the conditional p-values  $p(\Theta)$  over the parameter space of  $\Theta$ . Berger and Boos showed that restricting the maximization of the conditional p-values to a  $1-\beta$  confidence  $C_\beta$  set for  $\Theta$  (obtained when the null hypothesis is true), and adding  $\beta$  to this maximum, also results in a valid p-value (the “confidence interval p-value” see also (Berger et al, 2010; Lin & Yang, 2009).

**1.2. Test-based confidence intervals for the parameter  $n$  of a binomial distribution  $B(n,p)$ .** We used these intervals to determine upper confidence limits for the number of clones in a given tumor  $T$ . The procedure was as follows: Let  $H_0$  be the null hypothesis that all cells of  $T$  have the same probability  $s$  of being contained in the sample  $S$  of cells examined for the existence of clones, and assume  $H_0$  to hold true. Then, for a given total number  $n_0$  of tumor cells not contained in  $S$ , the probability that none of the clones corresponding to these cells is detected in  $S$  is equal to the probability that none out of any given set of  $n_0$  tumor cells is contained in  $S_1$ .

Given  $s$ , the upper bound of a two-sided test-based level  $(1-\beta)$  confidence interval for the number of clones not detected in  $S$  can thus be determined using a binomially distributed variable  $X \sim B(n,s)$ ,  $X$  being the number of cells (from a sample of  $n$  cells) which are detected in  $S$ , and is calculated as the highest number  $n=n_u$  of cells such  $P(X=0) \geq \beta/2$ . It is easily seen that  $n_u = \log(\beta/2)/\log(1-s)$ . The upper two-sided  $(1-\beta)$  confidence limit for the number of clones in  $T$  is then calculated as  $n_u$  plus the number of clones contained (i.e., “detected”) in  $S$ .

**1.3. Supremum p-values over possible constellations of unobservable count data.** This is a special case of supremum p-values, the missing numbers being regarded as nuisance parameters.

**1.4. Modelling of the cell growth process.** We modelled the cell growth process by means of a birth process (a Yule process, i.e. a Poisson process for the number of divisions a single cell) with an identical growth parameter for all cells of a clone. In view of the short time interval between transplantation and harvesting of the tumors and the scarcity of data available for estimating unknown parameters, cell death was not incorporated in the model. Within this model, null hypotheses regarding proliferation rates can then be expressed in terms of the growth parameters  $\lambda$ , i.e. the rate of the Poisson process. E.g., the null hypothesis of homogeneity of proliferation rates states that the

parameters  $\lambda_i$  of the processes are the same for each clone  $i$ . Clone size distributions were obtained by using known formulas for the Yule process (Bharucha-Reid, 1967) (p.403), which imply that cell numbers after a fixed time follow a negative binomial distribution  $NB(r,p)$ , with  $r$ = number of cells at  $t=0$  and  $p=\exp(-\lambda t)$ .

Two approximations were used throughout the analysis:

A) the number of transduced cells (among all cells of a tumor or a sample hereof) was set to be equal to the expected value calculated as the total cell number in the tumor or sample multiplied with the proportion of transduced cells, the latter having been determined in a separate analysis based on about 10,000 cells;

B) in order to describe sampling from a clone the binominal distribution was used when, in fact, the sampling depended on the total complex clone structure of a tumor, i.e. followed a multivariate hypergeometric distribution. The approximation was justified by the low probabilities of selection (ranging from 1.92% to 10% in primary or secondary mice). Adjustment for multiplicity was restricted to situations where several results (e.g., inferences for each clone in a tumor) were used in the same analysis, i.e. for testing the same hypothesis. No adjustment for multiple testing was done regarding the multiplicity of different hypotheses or experiments conducted.

## **2. Details of the analysis**

Notation: Let (for  $i=1,\dots,3$ )  $M_i$  designate primary, secondary, and tertiary mice (respectively),  $T_i$  the tumors of these mice,  $S_i$  the samples taken from these tumors and analysed for clonality,  $CS_i$  the clones detected in  $S_i$ ,  $CNS_i$  the clones present in  $T_i$  but not detected in  $S_i$ , and  $CNS_i^*$  the subset of the latter which were detected in samples of later mouse generations. Letters  $a,b,c$  (e.g.  $T_{2a}, T_{2b}$ ) will be used to differentiate between tumors and samples taken from several secondary mice (and analogously for tertiary mice). Let  $k(\dots)$  and  $n(\dots)$  denote the numbers clones and cells (respectively) in a sample of cells or a set of clones. If not stated differently, cell numbers will refer to tumors, not samples taken from tumors; thus, e.g.  $n(CNS_1)$  designates the number of cells in  $T_1$  contained in clones that were not detected in the sample  $S_1$ .

### **2.1. Heterogeneity of proliferation rates (null hypothesis: $H_{0-p1}$ )**

In order to ascertain the heterogeneity of proliferation rates in  $T_1$  we first determined an upper confidence bound,  $\lambda_u$ , for the parameter of the process under the assumption of  $H_{0-p1}$  that all clones in  $T_1$  had the same growth parameter. The upper bound was test-based. The idea underlying the procedure was that once the common growth parameter  $\lambda$  (and thus the expected clone size at time  $t_s$  of sampling) exceeded a certain level, this would no longer be statistically compatible with the rather high number of clones (namely, at least  $k(CNS_1^*)$  many) not present in the sample.

$\lambda_u$  was calculated using exact probabilities  $p_0$  that a particular clone is undetected in  $S_1$ , which

is given by

$$p_0(\lambda, s) = \sum_{i=0}^{\infty} P(X(t) = i) P(Y_i = 0)$$

where  $X(t)$  is size of this clone in  $T_1$  after time  $t$  and starting with a single cell at  $t=0$  (i.e.,  $X(t)$  follows a negative binomial distribution  $NB(1, \exp(-\lambda t))$ ), and  $Y_i$  describes the sampling from this clone. Hence,  $Y_i$  is binomially distributed as  $Y_i \sim B(i, s)$ ,  $s$  being the proportion of cells analysed for clonality (the ‘‘sampling fraction’’), which is the ratio of the cell numbers in  $S_1$  to those in  $T_1$ . Thus, a valid test-based level  $(1-\beta)$  confidence bound  $\lambda_u$  is given by the lowest value (of all discrete values examined) such that high observed ratio of undetected clones, namely,

$$R = \frac{k(CNS_1^*)}{k(CNS_1^*) + k(CS_1)}$$

is statistically “incompatible” with the probability  $p_0(\lambda, s)$ , meaning that  $P(Z \geq \text{CNS}_1^*) < \beta/2$ , where  $Z \sim B(k(\text{CNS}_1^*) + k(\text{CS}_1), p_0(\lambda, s))$ .

Of note, the ratio R ratio is not equal to the exact proportion of clones not present in the  $S_1$ , because neither the nominator nor the denominator includes unobserved clones contained in  $\text{CNS}_1 \setminus \text{CNS}_1^*$ . However, each of these clones would increase both the nominator and denominator by 1 and thus increase the proportion. Thus, a statistical test taken this modification into account would have an even lower p-value.

The time interval from transplantation ( $t=0$ ) to sampling ( $t_s$ ) was rescaled to one time unit. The growth parameter  $\lambda$  then is the mean number of cell divisions until  $t_s$ .

The value of  $\lambda_u$ , calculated at the  $1-10^{-5}$  confidence level, was then investigated to determine whether, conversely, it was statistically compatible with the very high observed clone sizes in  $\text{CS}_1$ . To obtain p-values we only considered the maximum observed clone size,  $c_{\max}$ . While the true number  $k(S_1)$  was unknown, for any assumed number  $k:=k(S_1)$  and given growth rate the probability distribution function  $F_\lambda(x)$  of the maximum clone size could be calculated using elementary results from extreme-value theory, viz.  $F_\lambda(x) = G_\lambda(x)^k$ , where  $G_\lambda(x)$  is the distribution function of the cell number of a clone after time  $t_s$ . The value of  $k$  used for the analysis was the sum of clones observed plus the upper ( $1-10^{-5}$ ) confidence bounds for the number of unobserved clones. Following the confidence interval p-value principle, 1-the confidence levels used for the nuisance parameters, i.e.  $2*10^{-5}$ , was then added.

## 2.2. Changes in proliferation rates (null hypothesis: $H_{0,p2}$ )

The analysis aimed to show that there was at least one clone in  $T_1$  whose proliferation rate increased in  $T_2$ . We based our analysis on the clone in  $\text{CNS}_1^*$  that was largest in  $\text{CS}_2$ , along with a Bonferroni adjustment for the multiple testing implicitly involved in this particular choice.

The analysis accounted for the fact that, in contrast to  $T_1$ , clones in  $T_2$  originated from more than one transplanted cell. The number of cells transplanted into the secondary mice and starting the growth process was itself a random variable, namely the result of a sampling process in the primary tumor. However, cell growth in  $T_1$  and  $T_2$  could be modelled as independent processes, due to the known property of Poisson processes of being memoryless.

The null hypotheses tested was a joint hypothesis, stating that sampling from tumors was random, and the proliferation rates of each clone in  $T_1$  were unchanged in  $T_2$ . We chose a statistical test based on the pair  $(X_1, X_2)$  of the observed sizes  $X_i$  of the same clone in  $S_1$  and  $S_2$ , respectively. The rejection region was such that it simultaneously reflected the fact that (under  $H_0$ ) at least one of the two clone sizes was too extreme to be compatible with any assumed proliferation rate  $\lambda$  (resp.). In view of the independence of the growth processes in  $T_1$  and  $T_2$ , the p-value was calculated as a product of probabilities namely  $p_1 * p_2$ , where  $p_1 = P(X_1 \leq c_1 | H_0)$  and  $p_2 = P(X_2 \geq c_2 | H_0)$ . Both  $p_1$  and  $p_2$  were calculated from identical clone size distributions, i.e. assuming identical growth rates and growth times (see the remarks below). The rejection region was thus defined by one-sided probabilities taken from the cumulative distribution of  $X_i$  under  $H_0$ . The particular definition of the test statistic implies that only *increases* in clone sizes from  $T_1$  to  $T_2$  were considered when calculating p-values. The single p-values  $p_1 = P(X_1 \leq c_1)$  and  $p_2 = P(X_1 \geq c_2)$  were then determined using the clone size distribution in  $S_1$  and  $S_2$ . From the definition of  $\text{CNS}_1^*$  it follows that  $c_1 = 0$ , while  $c_2$  was obtained by multiplying  $n(S_2)$  with the observed proportion of the clone in  $S_2$ . By construction  $p_1$  will be small for high growth rates, while  $p_2$  will be small for low growth rates of a clone. Therefore, the product  $p_1 p_2$  as a function of the growth rate  $\lambda$  has a maximum. This maximal value was determined and used as an upper bound for the p-value. The result was then adjusted for multiplicity, using upper 99% confidence bounds for the number of clones in  $\text{CNS}_1$ .

The analysis was restricted to P1-1, P2-1, P3-1, and P3-2, where the time interval from transplantation to purification in secondary mice was at most as long as in primary mice. Note that the shorter this interval the smaller the clones. This implies that the probability  $p_2$  calculated under the assumption of identical clone size distributions in  $T_1$  and  $T_2$  is an upper bound for the true value of  $p_2$  if proliferation time in  $T_2$  is shorter than in  $T_1$ .

### 2.3. Heterogeneity of the seeding efficiency (null hypothesis: $H_{0,S}$ )

We defined seeding efficiency at the clone level. The following definition was used: Seeding efficiency (SE) = probability that a randomly chosen cell of a clone that is transplanted into a mouse proliferates or survives until the time  $t_s$  when the tumor is examined for clonality.

All inferences regarding the SE of a clone had to be deduced from two data points, namely the estimated clone sizes at times  $t_0$  (transplantation) and  $t_s$  (cell sampling from the tumor).

We focused the analysis on  $T_2$ , and, more specifically, on the first secondary mouse  $M_{2a}$ . The analysis was aimed at showing that a lower bound for the SE (in  $T_{2a}$ ) of cells in clones contained  $CNS_1$  was significantly higher than an upper bound for the SE of at least one clone in  $CS_1$  (while adjusting for multiplicity of testing).

A lower bound for the SE of cells in  $CNS_1$  was obtained by observing that the nominator  $n_A$  of SE, i.e., the number of cells in (clones of)  $CNS_1$  successfully transplanted into  $M_{2a}$  was at least as large as the number clones in  $CNS_1$  observed either in  $M_{2a}$  or its corresponding tertiary mice. To obtain an upper bound  $d_A$  for the denominator the number of cells in  $CNS_1$  was replaced with their upper 99.9% confidence bound. Thus, at the 99.9% confidence level for the denominator the SE of cells in  $CNS_1$  was at least  $n_A/d_A$ . The clone selected for comparison was the largest clone  $C$  in  $CS_1 \cap CNS_2$ . A lower 99.9% confidence bound,  $p$ , for its clone proportion of  $C$  in  $T_1$  was calculated based on the observed proportion of  $C$  in  $S_1$ . Multiplying  $p$  with the number of cells of  $T_1$  transplanted into the secondary mouse yielded a lower 99.9% confidence bound,  $d_B$ , for the number of cells in  $C$  transplanted into the secondary mouse. This number served as the denominator for calculating an upper bound for the SE of  $C$ . Since  $C$  was undetected in  $T_2$ , an upper 99.9% confidence bound for the size of  $C$  in  $T_2$  was obtained as described above. This yielded an upper bound for the number of cells in  $C$  successfully seeded and was used as the nominator  $n_B$  for the SE of  $C$  in  $M_{2a}$ . The ratios  $d_A/n_A$  and  $d_B/n_B$  were then compared using an exact test, and the resulting p-value was adjusted for multiplicity involved in the particular selection of  $C$  (a Bonferroni adjustment with the total number of clones in  $CS_1$  being the adjustment factor).

### 3. Appendix Supplementary Statistical Results

#### Upper bounds for the number of clones in a tumor

Upper confidence bounds,  $N_u^-$ , for the number of cells,  $N^+$ , in clones present, but not detected in tumors  $T_1$  and  $T_{2a}$ ,  $T_{2b}$ ,  $T_{2c}$  of primary and secondary mice, respectively are given in Supplemental statistical results Appendix Table S3.

At the same time, these numbers may be viewed as upper bounds for the total number of clones contained in CNS (assuming the worst case that each of these clones consist of a single cell). In contrast to  $CNS_i$ , the values  $CNS_i^*$  ( $i=1,\dots,3$ ) were observable. In case of P1-1, e.g.,  $CNS_1^*$  contained 30 clones. The numbers given in Appendix Table S3 impose upper limits to the (mean) size of clones in  $CNS_i^*$ , which are obtained by dividing  $N_u^-$  by the number of clones in  $CNS_i^*$ , yielding, e.g., at level  $1-\beta=99\%$ , a mean size of about 5 in case of the primary mouse of P1-1. In other words, clones that were definitely present, but non-detected were few and mostly extremely small, a fact that was evident even without a numerical analysis.

Clone sizes within a tumor were quite heterogeneous. Appendix Table S4 shows the estimated sizes (cell numbers) of the largest and smallest clones detected in  $S_1$  as well as an upper bound for the smallest clone in  $CNS_1$ . For clones observed in  $S_1$ , the numbers were simply obtained by multiplying the clone size proportions in  $S_1$  with the number of cells in  $T_1$ . For clones in  $CNS_1$ , the upper confidence bounds from Appendix Table S3 were used and divided by the minimum number of clones contained in  $CNS_1$ , viz. the number of clones in  $CNS_1^*$ .

#### Heterogeneity of proliferation rates

Based on the minimum number of unobserved clones and assuming the null hypothesis of homogeneous proliferation rates  $\lambda$  across the clones of  $T_1$ , a value of  $\lambda_u=5$  was obtained as an upper bound for the common rate at the  $(1-10^{-5})$  confidence level for each experiment. However, using the extreme-value distribution with the total number of clones being limited by the observed clones plus the values in Supplemental statistical results Appendix Table 1 (again at the  $(1-10^{-5})$  confidence level),  $\lambda=5$  was not compatible with the size of the largest clone  $T_1$  ( $p<10^{-8}$  based on the negative binomial distribution). Adding 1-confidence levels of the nuisance parameters (twice  $10^{-5}$ ), the result remained highly significant (confidence interval p-value  $<10^{-4}$ ) for each experiment.

#### Changes in proliferation rates

The statistical analysis focused on those clones in  $CNS_1^* \cap CS_2$  which were largest in  $CS_2$ . One may note that the change in growth rates from  $T_1$  to  $T_2$  would be evident for these clones if sampling of cells from the tumor were the only source of random variation for their observed size (which would be the case if clone growth were adequately described by a non-stochastic differential equation). The reason is that clones in  $CNS_1^*$  were necessarily very small (see Appendix Table S3,4), while those in  $CS_2$  were large. Under the null hypothesis that growth of every clone remained unchanged from  $T_1$  to  $T_2$ , the nominal p-value, calculated as a confidence interval p-value (with the true unknown clone size in  $T_1$  (and thus also in  $T_2$ ) being the nuisance parameter) was  $<10^{-6}$  in each experiment and remained significant at the 0.001 level after adjustment for the multiplicity of tests.

Under our model of clone growth as a Poisson process, which implies a high variability of true clone sizes - even for clones with identical growth rates -, the analysis was more complex. Carrying out the procedure as described, the upper bounds for the nominal p-values obtained for P1-1, P2-1, P3-1, P3-2 were 0.00033, 0.000056, 0.000034, and  $3.8 \cdot 10^{-6}$ , respectively. Except for P1-1 they remained significant at the  $\alpha=0.05$  level after adjusting for multiplicity and the use of confidence interval p-values.

### **Analysis of seeding efficiency**

The analysis of the heterogeneity of clones with respect to seeding efficiency focused on seeding efficiency in  $M_{2a}$ . A statistical comparison between a lower bound for the seeding efficiency (in  $M_{2a}$ ) of clones in  $CNS_1$  versus an upper bound for the largest clone (largest with respect to  $T_1$ ) in  $CS_1 \cap CNS_2$  was performed for the first 4 experiments. It yielded nominal p-values of  $p=0.0001$  in case of P1-1, and  $p < 10^{-6}$  in case P2-1, P3-1, and P3-2, and thus remained significant ( $p < 0.01$ ) after adjusting for the use of confidence interval p-values and multiplicity of testing. This demonstrates that transplanted clones were heterogeneous with respect to seeding efficiency in secondary mice.

## 4. Appendix Supplementary References

Barnard GA (1947) Significance Tests for 2x2 Tables. *Biometrika* 34: 123-138

Berger MF, Levin JZ, Vijayendran K, Sivachenko A, Adiconis X, Maguire J, Johnson LA, Robinson J, Verhaak RG, Sougnez C, Onofrio RC, Ziaugra L, Cibulskis K, Laine E, Barretina J, Winckler W, Fisher DE, Getz G, Meyerson M, Jaffe DB et al (2010) Integrative analysis of the melanoma transcriptome. *Genome Res* 20: 413-427

Berger RL, Boos DD (1994) P-Values Maximized over a Confidence Set for the Nuisance Parameter. *JASA* 89: 1012-1016

Bharucha-Reid AT (1967) Review: An Introduction To Probability Theory And Its Applications. By William Feller. *Am Math Monthly* 74: 460

Lin CY, Yang MC (2009) Improved p-Value Tests for Comparing Two Independent Binomial Proportions. *Commun Stat Simul Comput* 38: 78-91
