# Supplementary material for: Succession of transiently active tumor‐initiating cell clones in human pancreatic cancer xenografts
Source: PubMed Central journal article supplement (PMC5494525; doi:10.15252/emmm.201607354), 2017-05-19
Supplement: EMMM-9-918-s002.pdf [file EMMM-9-918-s002.pdf]

## Expanded View Figures

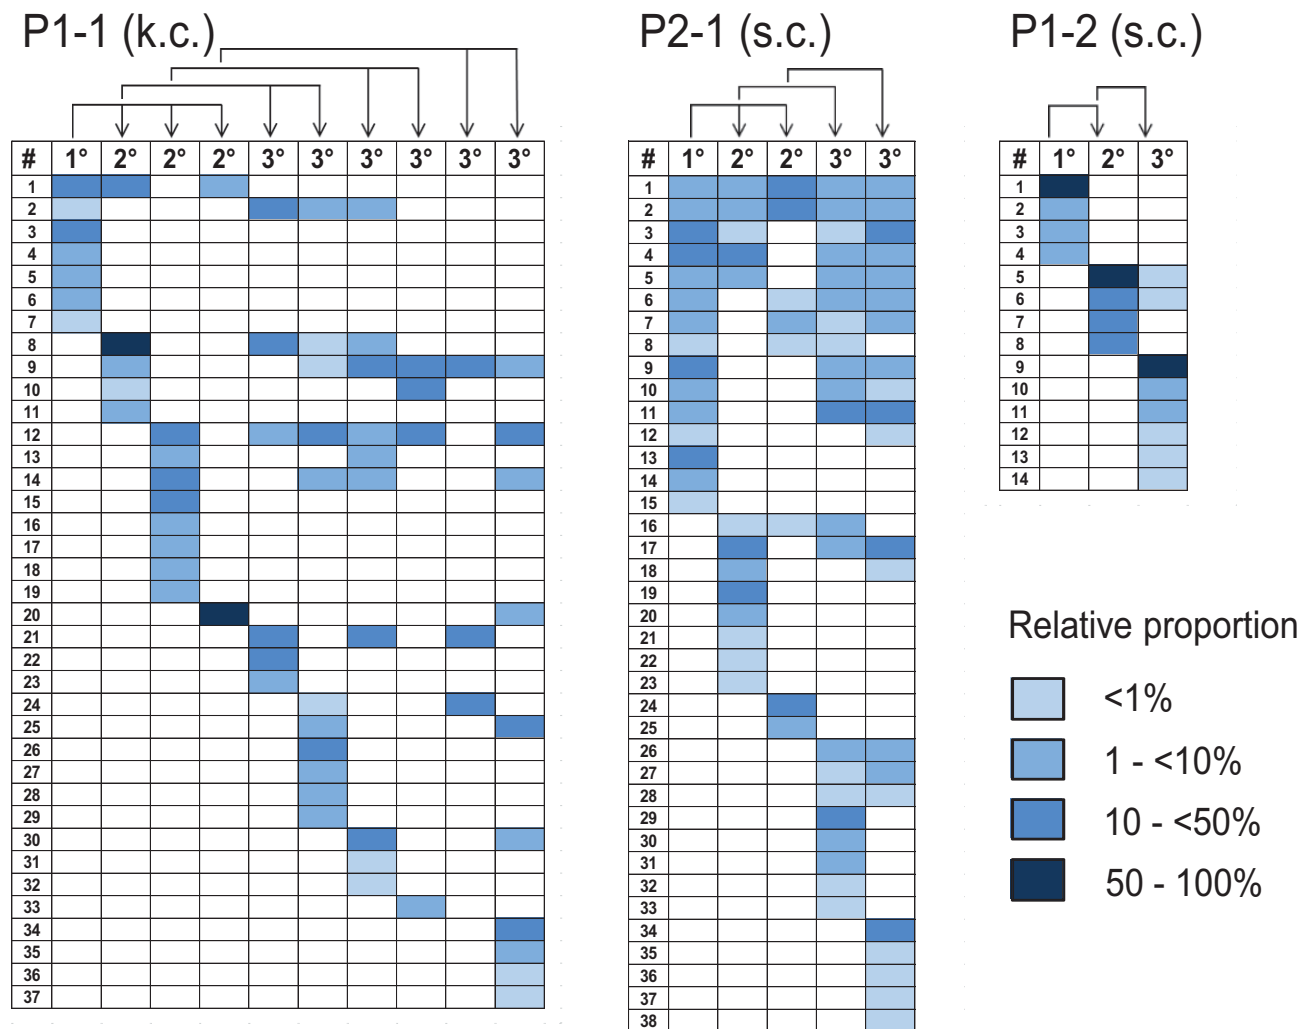**Figure EV1. Long-term tumor growth is maintained by clonal succession of pancreatic TICs.**

High-throughput sequencing of lentiviral insertion sites (IS) shows that distinct sets of marked clones formed serial tumors derived from the same individual primary xenograft. Columns indicate distinct mouse generations ( $1^\circ/2^\circ/3^\circ$ ). Rows indicate distinct lentiviral integration sites. Arrows indicate serial transplantation steps; PX-Y: X = patient number and Y = experiment number.

**Figure EV2. Proliferation of TIC cultures *in vitro* is driven by clonal succession.**

- A Patient-derived adherent TIC cultures were lentivirally marked and passaged 8 times *in vitro*.  
 B Lentivirally marked TIC cultures were transplanted directly into NSG mice. After tumor purification, cells were taken into culture for several passages (*ex vivo*). IS analysis was done by LAM-PCR.

Data information: In serial passaging, distinct sets of tumor cells drive proliferation of *in vitro* (A) and *ex vivo*-cultured lentivirally marked xenografts (B). Blue fields indicate the relative contribution of individual clones as depicted in the color legend. Columns indicate distinct passages (1–8 $^\circ$ ). Rows indicate distinct lentiviral integration sites. Arrows indicate passaging steps; PX-Y: X = patient number and Y = experiment number.

**A** P2-2 (*in vitro*)

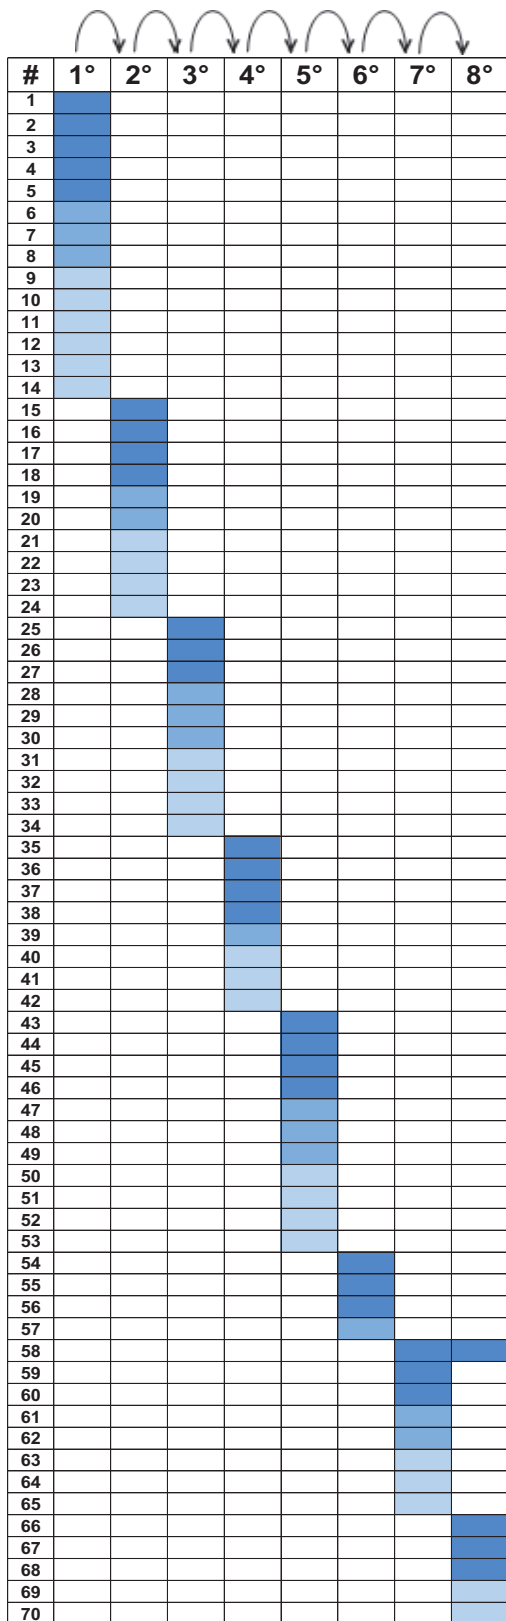

**P3-4 (*in vitro*)**

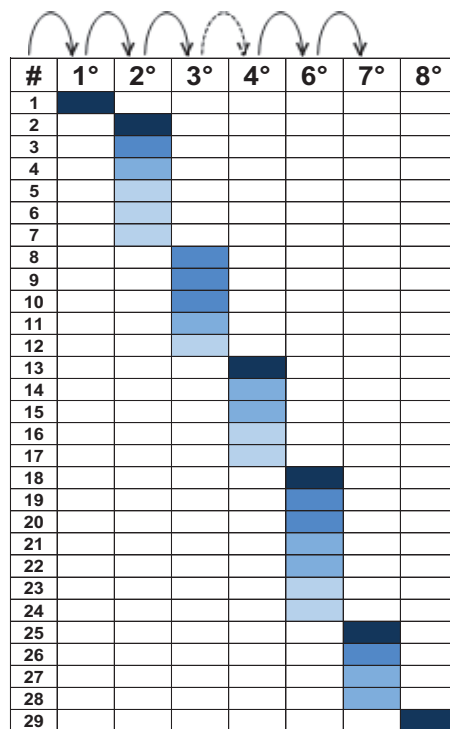

**B** P3-4 (*ex vivo*, xenograft derived)

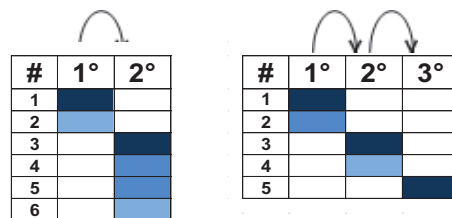

Xenograft 1    Xenograft 2

Relative proportion

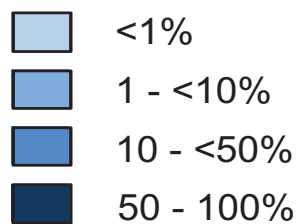

Figure EV2.
